# Supplementary material
Source: PubMed Central journal article supplement (PMC166189)

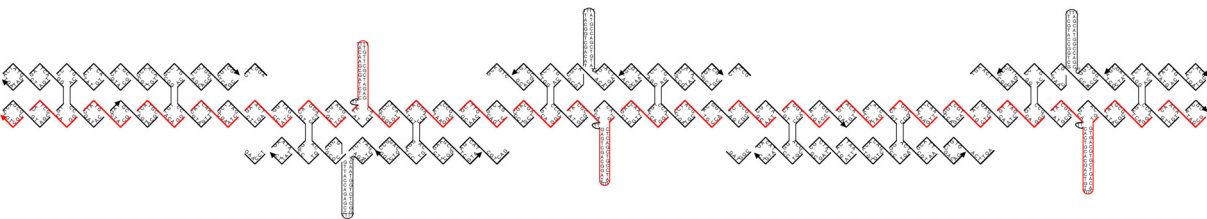

Supplement: pnas_100_14_8103__2.pdf [file pnas_100_14_8103__2.pdf]

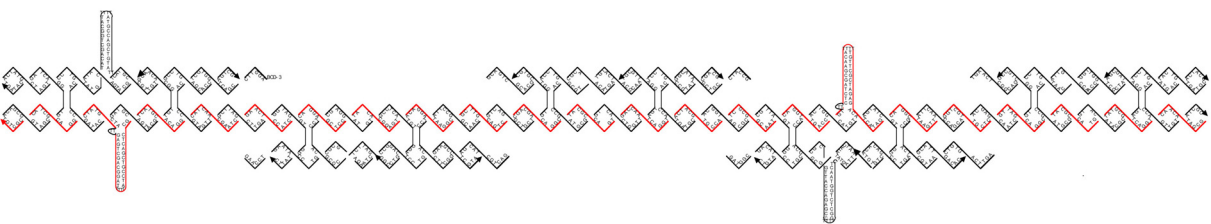

Supplement: pnas_100_14_8103__4.pdf [file pnas_100_14_8103__4.pdf]

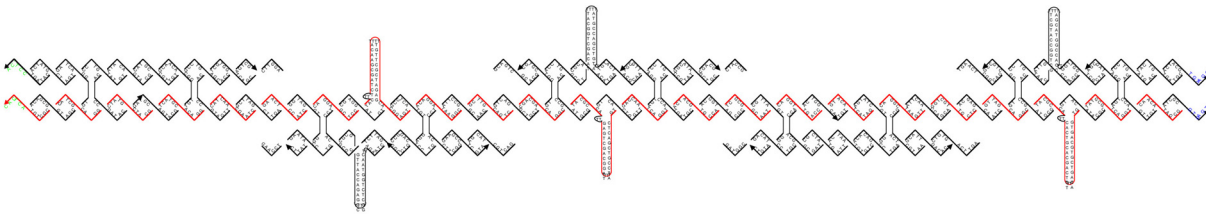

Supplement: pnas_100_14_8103__6.pdf [file pnas_100_14_8103__6.pdf]

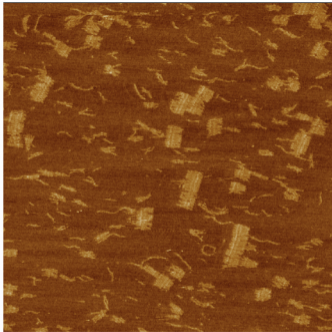

1500x1500 nm

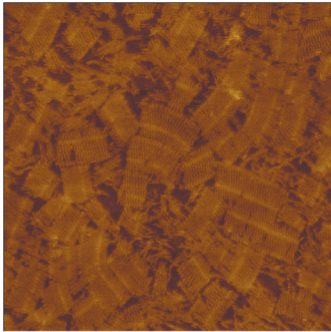

850x850 nm

Supplement: pnas_100_14_8103__8.pdf [file pnas_100_14_8103__8.pdf]
